# Supplementary material for: Improved Healing after Non-Surgical Periodontal Therapy Is Associated with Higher Protein Intake in Patients Who Are Non-Smokers
Source: MDPI journal article supplement (doi:10.3390/nu13113722), 2021-10-22
Supplement: s1 [file s1]

**Supplemental Table S1.** Descriptive statistics and clinical parameters of excluded participants. <sup>1</sup>

|                                         | <b>Included (<i>n</i> = 85)</b> | <b>Excluded (<i>n</i> = 44)</b> | <b><i>P</i> value</b> |
|-----------------------------------------|---------------------------------|---------------------------------|-----------------------|
| Age, years                              | 57 ± 11 (34 – 90)               | 56 ± 14 (23 – 83)               | 0.57                  |
| Sex, <i>n</i> (%)                       |                                 |                                 |                       |
| Males                                   | 42 (49)                         | 17 (39)                         | 0.24                  |
| Females                                 | 43 (51)                         | 27 (61)                         | 0.24                  |
| BMI, <i>n</i> (%)                       |                                 |                                 |                       |
| Normal, 18.5 – 24.9                     | 18 (21)                         | 16 (36)                         | 0.06                  |
| Overweight, 25.0 – 29.9                 | 35 (41)                         | 13 (30)                         | 0.20                  |
| Obese, ≥ 30.0                           | 32 (38)                         | 15 (34)                         | 0.69                  |
| Smoking status, <i>n</i> (%)            |                                 |                                 |                       |
| Never smoked                            | 30 (35)                         | 17 (39)                         | 0.71                  |
| Former smoker                           | 33 (39)                         | 12 (27)                         | 0.19                  |
| Current smoker                          | 22 (26)                         | 15 (34)                         | 0.33                  |
| Baseline clinical measures <sup>2</sup> |                                 |                                 |                       |
| Number of Teeth                         | 25 ± 4 (12 – 32)                | 25 ± 5 (5 – 32)                 | 0.68                  |
| PD, # sites ≥ 4 mm                      | 93 ± 38 (7 – 173)               | 78 ± 46 (20 – 158)              | 0.06                  |
| BOP, % sites                            | 50 ± 30 (0 – 100)               | 59 ± 39 (0 – 100)               | 0.23                  |
| Plaque Score, % teeth                   | 72 ± 29 (0 – 100)               | 72 ± 24 (30 – 100)              | 0.98                  |
| Serum 25-hydroxyvitamin D, nmol/L       | 61 ± 23 (13 – 129)              | 56 ± 21 (31 – 132)              | 0.39                  |

<sup>1</sup> All values are means ± SDs (range) for continuous variables and counts (%) for categorical variables. Non-standard abbreviations: HTN, hypertension; CAD, coronary artery disease; BOP, bleeding on probing; PD, probing depth.

<sup>2</sup> Does not include individuals excluded due to not having ≥ 30% sites with PD ≥ 4 mm.
